# Supplementary material
Source: publisher site journal article supplement (https://www.dovepress.com/article/479153)
Supplement: Supplementary file 1 [file get_supplementary_file.php]

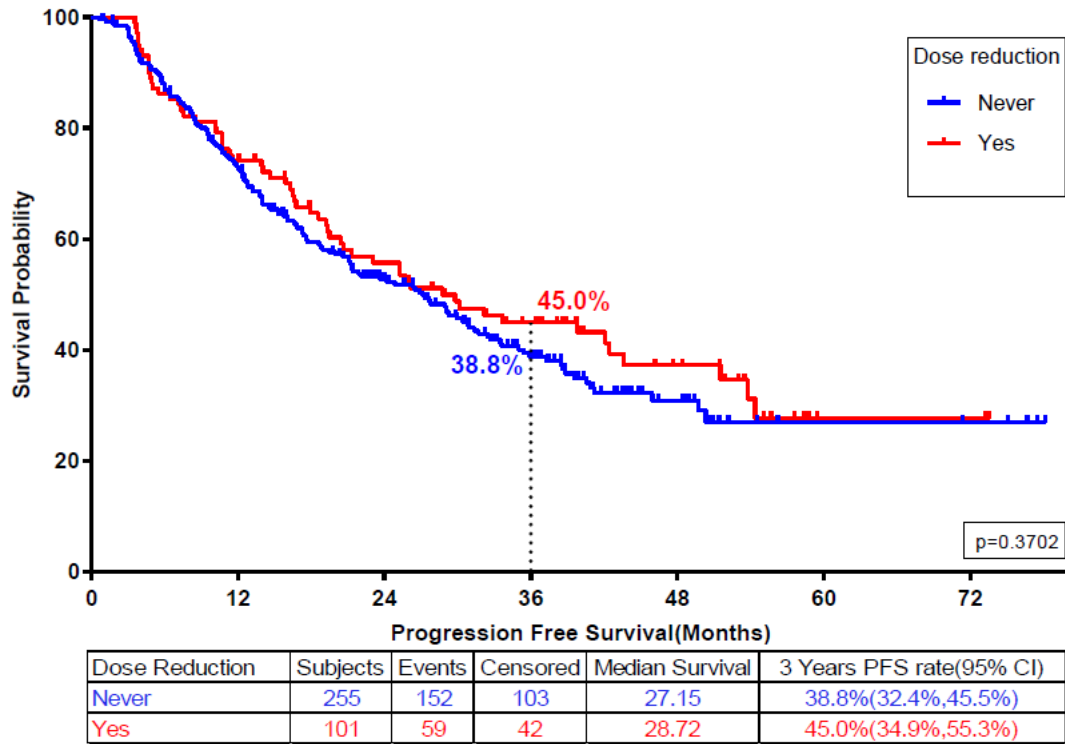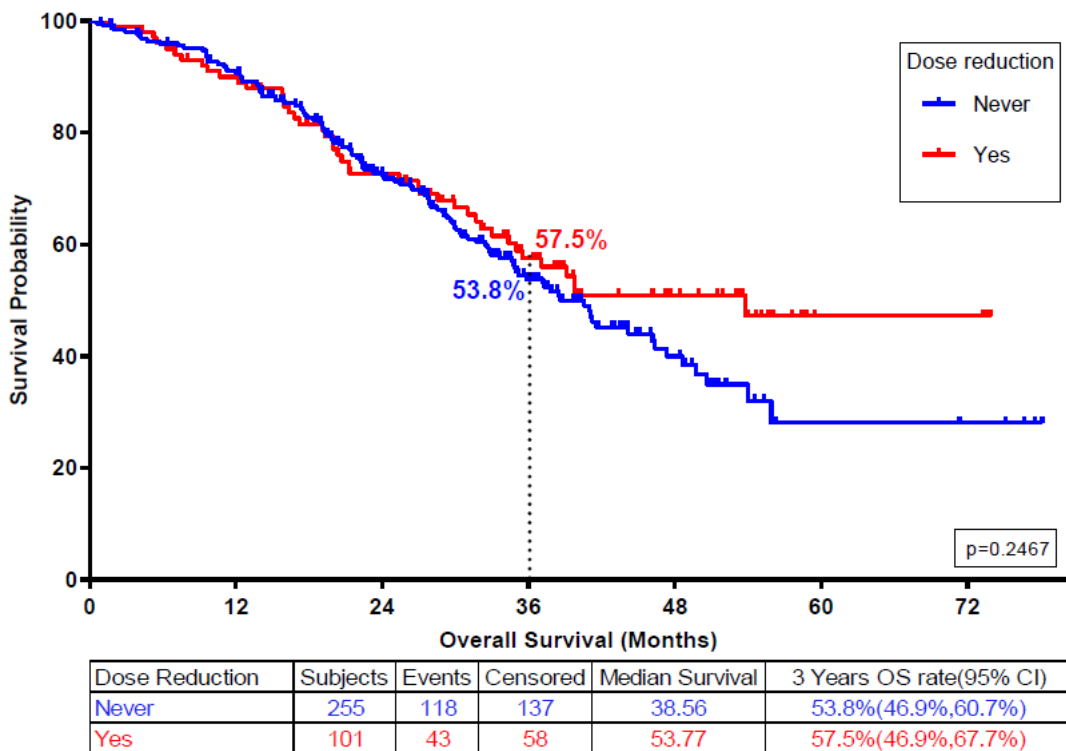

**Supplementary Figure** The 3-year PFS and OS between patients with dose reduction and those never had dose reduction.
